# Supplementary material
Source: PubMed Central journal article supplement (PMC8048222)
Supplement: 12889_2021_10739_MOESM1_ESM.pdf [file 12889_2021_10739_MOESM1_ESM.pdf]

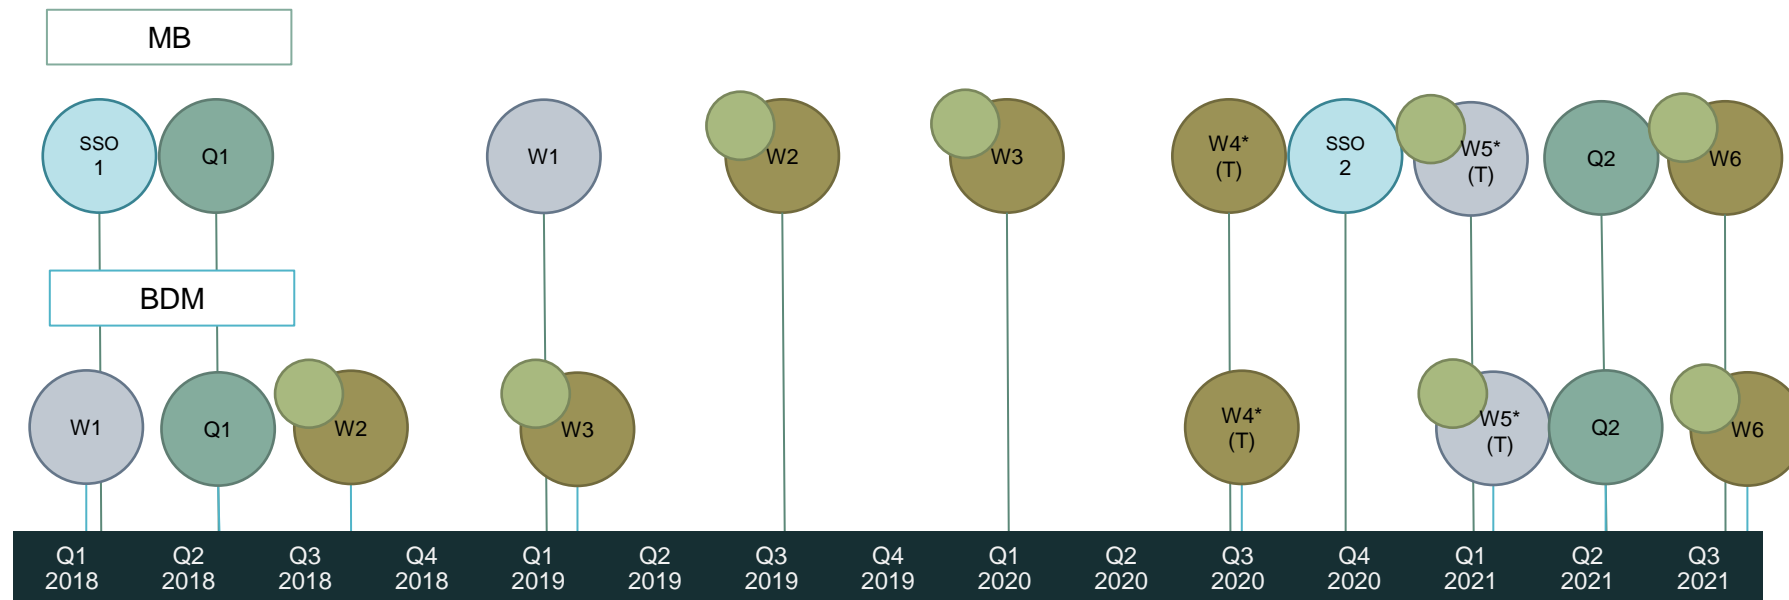

○ RUCAS survey (full version) and RUCAS IDO tool

○ Qualitative study

○ RUCAS survey (short version) and RUCAS IDO tool

○ PARA and SOPARC

○ Hygrochrons

(T) Telephone application due to COVID19 pandemic  
\* Includes COVID19-related questions
